# Supplementary material for: Ni–Co Prussian blue analogue/graphene aerogel: a green synthesis approach for high-performance electromagnetic wave absorption and radar stealth applications
Source: Royal Society of Chemistry journal article supplement (doi:10.1039/d3tc02809g), 2023-01-01
Supplement: d3tc02809g1.pdf [file d3tc02809g1.pdf]

## Electronic Supplementary Information

Ni-Co Prussian blue analogue/graphene aerogel: A green synthesis  
approach for high-performance electromagnetic wave absorption and  
radar stealth applications

*Weijie Liang<sup>a</sup>, Ying Wang<sup>a,\*</sup>, Feng Gao<sup>a,\*</sup>, Shikun Hou<sup>a</sup>, Qiong Wu<sup>a</sup>, Hua Yang<sup>a</sup>, Fei  
Jin<sup>a</sup>, Gongxun Bai<sup>a</sup>, Yahui Wang<sup>b</sup>, Zhenbao Li<sup>c</sup> and Hongliang Ge<sup>a,\*</sup>*

*<sup>a</sup> Magnetism Key Laboratory of Zhejiang Province & College of Optical and Electronic  
Technology, China Jiliang University, Hangzhou 310018, China*

*<sup>b</sup> Anhui Provincial Laboratory of Advanced Laser Technology, College of Electronic  
Engineering, National University of Defense Technology, Hefei 230037, China*

*<sup>c</sup> Superconducting Materials Research Center, Northwest Institute for Nonferrous  
Metal Research, Xi'an, 710016, China*

---

\*Corresponding Authors. E-mail address: yingwang@cjlu.edu.cn (Y. Wang); gaofeng@cjlu.edu.cn

(F. Gao); hongliang\_ge@cjlu.edu.cn (H. Ge)

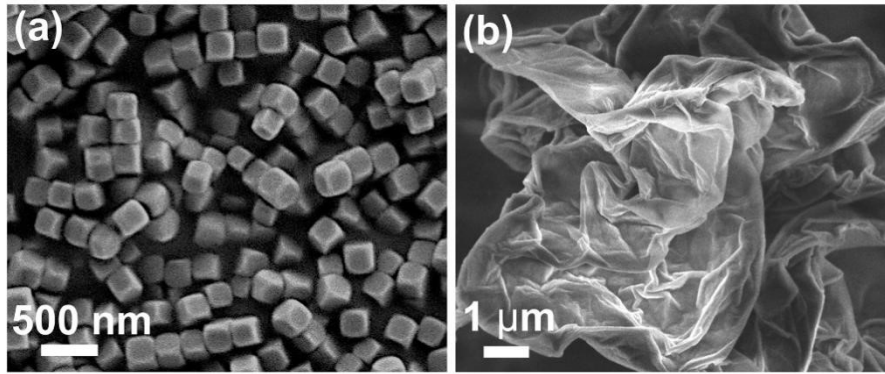

Fig. S1. SEM images of Ni-Co PBA (a) and GO (b).

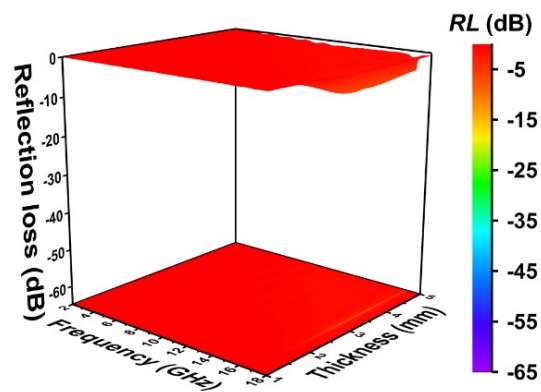

Fig. S2. 3D *RL* values plot of Ni-Co PBA.

**Table S1** EMW absorption performance of some graphene-based composites in previous reports and this work.

| Samples                                                  | Minimum RL<br>(Frequency, thickness) | EAB < -10 dB<br>(GHz, range, thickness) | Ref.      |
|----------------------------------------------------------|--------------------------------------|-----------------------------------------|-----------|
| Co-doped Ni-Zn ferrite/Graphene                          | -58.3 dB (5.2 GHz, 4.6 mm)           | 4.8 GHz (7.2-12.0 GHz), 3.0 mm          | [1]       |
| Fe <sub>3</sub> O <sub>4</sub> -C/Reduced graphene oxide | -60.5 dB (4.8 GHz, 3.6 mm)           | 5.5 GHz (11.2-16.7 GHz), 1.5 mm         | [2]       |
| Co/N-doped graphene/Carbon nanotubes                     | -65.5 dB (17.5 GHz, 1.5 mm)          | 4.3 GHz (10.5-14.8 GHz), 2.0 mm         | [3]       |
| Fe <sub>3</sub> O <sub>4</sub> /Graphene                 | -37.5 dB (2.8 GHz, 6.5 mm)           | 3.8 GHz (12.6-16.4 GHz), 1.6 mm         | [4]       |
| Fe <sub>3</sub> O <sub>4</sub> -Reduced graphene oxide   | -49.5 dB (6.3 GHz, 3.4 mm)           | 2.9 GHz (14.6-17.5 GHz), 1.3 mm         | [5]       |
| Ni/Carbon nanotube/Graphene                              | -45.5 dB (6.2 GHz, 5.0 mm)           | 5.6 GHz (11.9-17.5 GHz), 2.5 mm         | [6]       |
| Polyaniline/Graphene aerogel                             | -42.3 dB (11.2 GHz, 3.0 mm)          | 3.2 GHz (8.7-11.9 GHz), 3.0 mm          | [7]       |
| ZnO/Reduced graphene oxide foam                          | -27.8 dB (9.6 GHz, 4.8mm)            | 4.2 GHz (8.2-12.4 GHz), 4.8 mm          | [8]       |
| NiAl-layered double hydroxide/graphene                   | -41.5 dB (17.8 GHz, 1.4 mm)          | 4.4 GHz (13.4-17.8 GHz), 1.6 mm         | [9]       |
| Ni-Co PBA/GA                                             | -62.3 dB (13.3 GHz, 2.3 mm)          | 5.6 GHz (12.4-18.0 GHz), 2.1 mm         | This work |

## References:

- 1 Liu, P.; Yao, Z.; Zhou, J.; Yang, Z.; Kong, L. B. Small Magnetic Co-Doped NiZn Ferrite/Graphene Nanocomposites and Their Dual-Region Microwave Absorption Performance, *J. Mater. Chem. C.*, 2016, **4**, 9738-9749.
- 2 Shu, R.; Wu, Y.; Li, W.; Zhang, J.; Liu, Y.; Shi, J.; Zheng, M. Fabrication of Ferroferric Oxide–Carbon/Reduced Graphene Oxide Nanocomposites Derived from Fe-Based Metal–Organic Frameworks for Microwave Absorption, *Compos Sci Technol.*, 2020, **196**, 108240.
- 3 Wang, K.; Zhang, S.; Chu, W.; Li, H.; Chen, Y.; Chen, B.; Chen, B.; Liu, H. Tailoring Conductive Network Nanostructures of ZIF-Derived Cobalt-Decorated N-Doped Graphene/Carbon Nanotubes for Microwave Absorption Applications, *J. Colloid Interface Sci.*, 2021, **591**, 463-473.
- 4 Du, Z.; Chen, X.; Zhang, Y.; Que, X.; Liu, P.; Zhang, X.; Ma, H.-L.; Zhai, M. One-Pot Hydrothermal Preparation of Fe<sub>3</sub>O<sub>4</sub> Decorated Graphene for Microwave Absorption, *Materials*, 2020, **13**, 3065.
- 5 Qilong, S.; Lei, S.; Yingying, C.; Wei, Y.; Sijun, X.; Tao, J.; Guoqiu, Y. Fe<sub>3</sub>O<sub>4</sub>-Intercalated Reduced Graphene Oxide Nanocomposites with Enhanced Microwave Absorption Properties, *Ceram. Int.*, 2019, **45**, 18298-18305.
- 6 Xu, X.; Wang, G.; Wan, G.; Shi, S.; Hao, C.; Tang, Y.; Wang, G. Magnetic Ni/Graphene Connected with Conductive Carbon Nano-Onions or Nanotubes by

Atomic Layer Deposition for Lightweight and Low-Frequency Microwave Absorption, *Chem. Eng. J.*, 2020, **382**, 122980.

7 Wang, Y.; Gao, X.; Fu, Y.; Wu, X.; Wang, Q.; Zhang, W.; Luo, C. Enhanced Microwave Absorption Performances of Polyaniline/Graphene Aerogel by Covalent Bonding, *Compos. B. Eng.*, 2019, **169**, 221-228.

8 Song, C.; Yin, X.; Han, M.; Li, X.; Hou, Z.; Zhang, L.; Cheng, L. Three-Dimensional Reduced Graphene Oxide Foam Modified with ZnO Nanowires for Enhanced Microwave Absorption Properties, *Carbon*, 2017, **116**, 50-58.

9 Xu, X.; Shi, S.; Tang, Y.; Wang, G.; Zhou, M.; Zhao, G.; Zhou, X.; Lin, S.; Meng, F. Growth of NiAl-Layered Double Hydroxide on Graphene toward Excellent Anticorrosive Microwave Absorption Application, *Adv. Sci.*, 2021, **8**, 2002658.

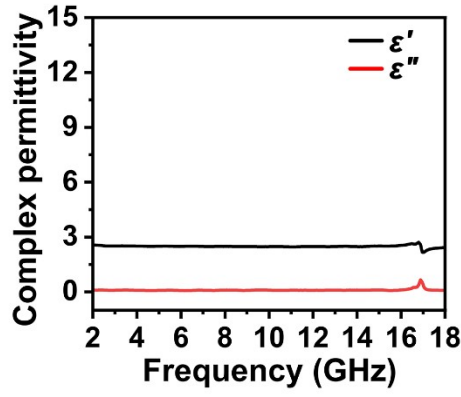

Fig. S3. The complex permittivity of Ni-Co PBA.

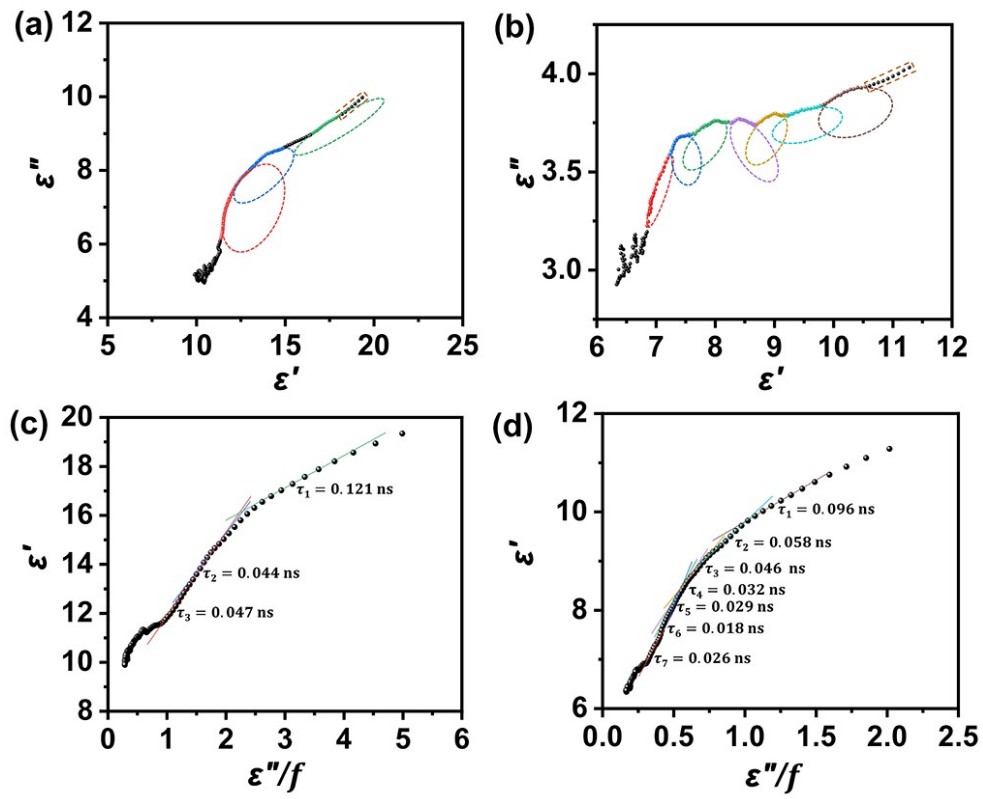

Fig. S4. The plots of  $\epsilon'$  versus  $\epsilon''$  for GA (a) and Ni-Co PBA/GA (b), and the corresponding relationships between  $\epsilon'$  and  $\epsilon''/f$  of GA (c) and Ni-Co PBA/GA (d).

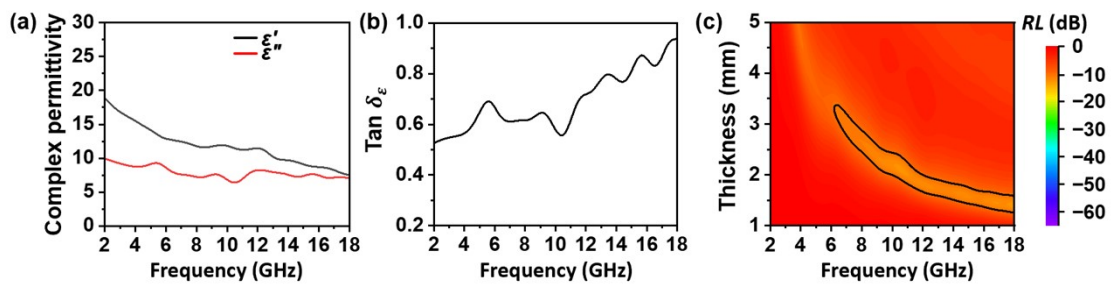

**Fig. S5.** The  $\epsilon'$  and  $\epsilon''$  (a),  $\tan \delta_{\epsilon}$  (b), and 2D  $RL$  plots of SB-Ni-Co PBA/GA in the frequency range from 2.0 to 18.0 GHz.

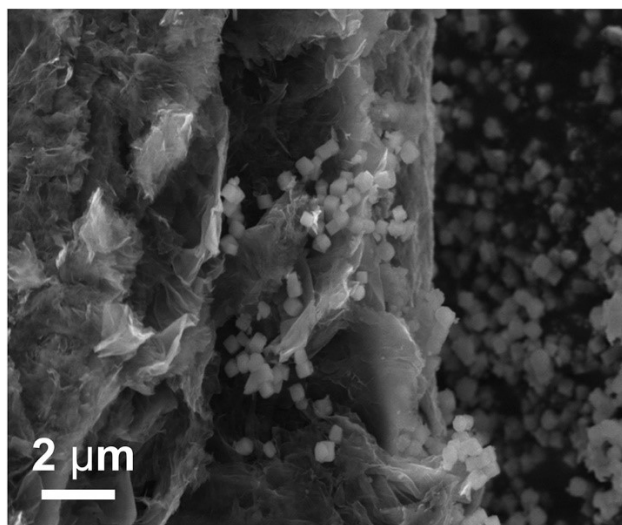

**Fig. S6.** SEM image of SB-Ni-Co PBA/GA.

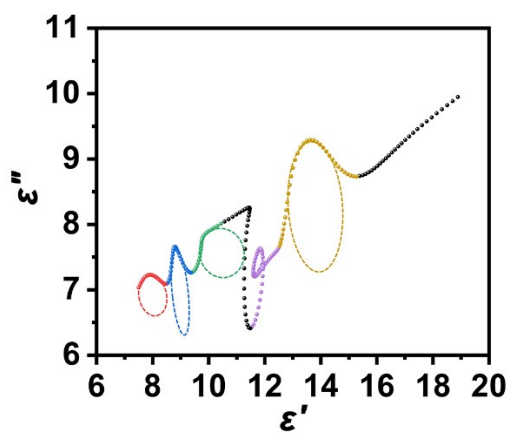

**Fig. S7.** The plot of  $\epsilon'$  versus  $\epsilon''$  for SB-Ni-Co PBA/GA.

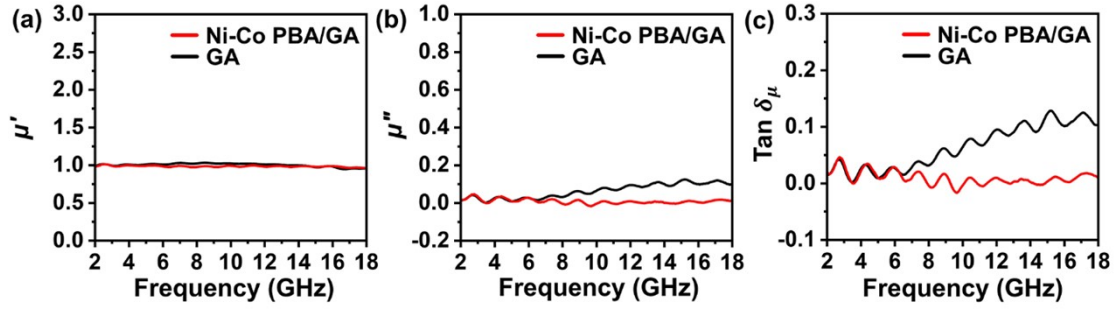

Fig. S8. The  $\mu'$  (a),  $\mu''$  (b),  $\tan \delta_\mu$  (c) of GA and Ni-Co PBA/GA in the frequency range from 2.0 to 18.0 GHz.

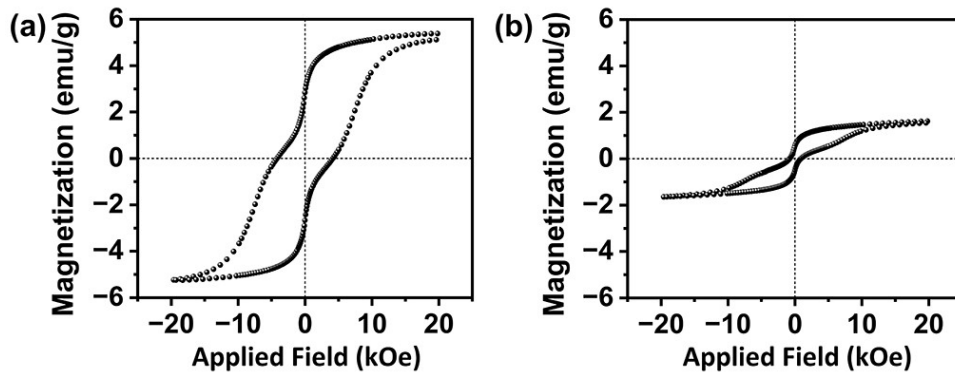

Fig. S9. The magnetic hysteresis loops of GA (a) and Ni-Co PBA (b).

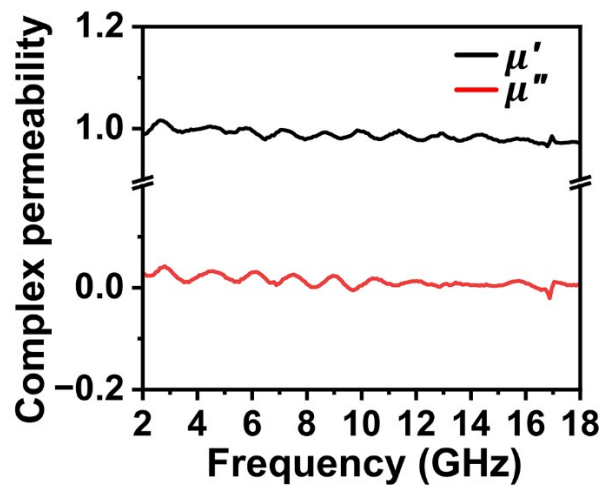

Fig. S10. The complex permeability of Ni-Co PBA.



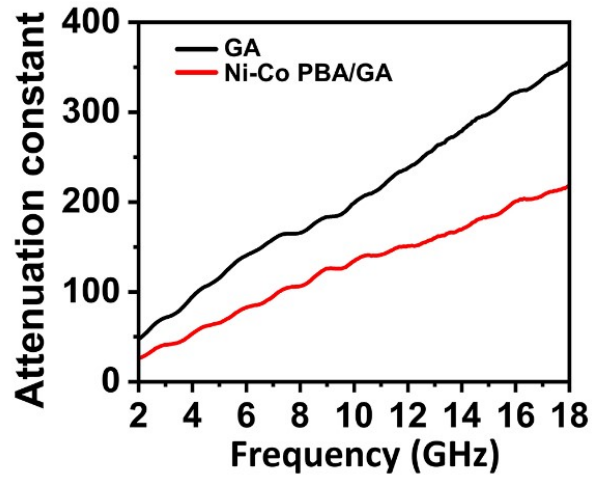

Fig. S11. The attenuation coefficient ( $\alpha$ ) of GA and Ni-Co PBA/GA.

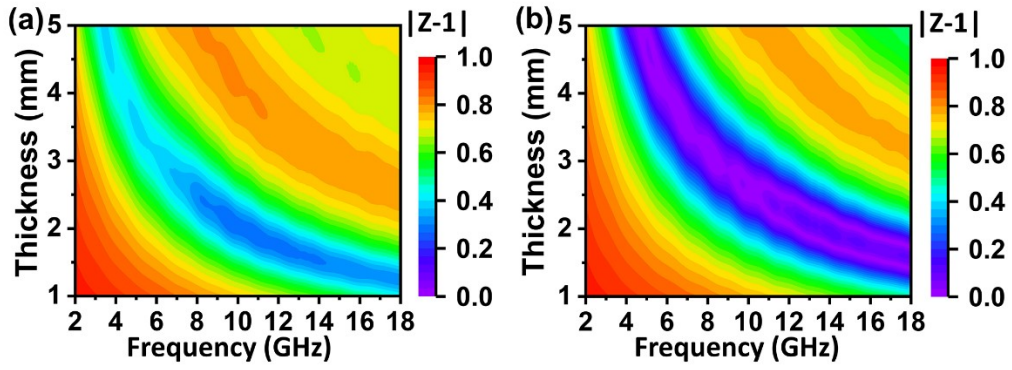

Fig. S12. The  $|Z-1|$  values of GA (a) and Ni-Co PBA/GA (b).
